# Supplementary material for: Role of the Aspartate Transaminase and Platelet Ratio Index in Assessing Hepatic Fibrosis and Liver Inflammation in Adolescent Patients with HBeAg-Positive Chronic Hepatitis B
Source: Hindawi journal article supplement (doi:10.1155/2015/906026), 2015-01-01
Supplement: f1 [file 906026.f1.pdf]

**Table S1: Univariate analysis of variables associated with significant liver fibrosis in 88 adolescent patients with CHB**

| Index                    | Patients with mild liver fibrosis (n=45) | Patients with significant liver fibrosis (n=43) | Univariate analysis P value |
|--------------------------|------------------------------------------|-------------------------------------------------|-----------------------------|
| Age (years)              | 8.97±5.37                                | 8.99±5.93                                       | 0.985                       |
| Gender male              | 32(71.1%)                                | 25(58.1%)                                       | 0.203                       |
| female                   | 13(28.9%)                                | 18(41.9%)                                       |                             |
| ALT(IU/L)                | 122.40±153.57                            | 187.88±192.95                                   | 0.081                       |
| AST(IU/L)                | 83.71±61.60                              | 130.26±109.04                                   | 0.017                       |
| AST/ALT                  | 0.97±0.53                                | 0.86±0.48                                       | 0.295                       |
| TBIL(umol/L)             | 9.68±5.30                                | 9.40±4.70                                       | 0.791                       |
| CHE*(U/L)                | 7572.13±1281.39                          | 7074.70±1289.61                                 | 0.073                       |
| PLT(×10 <sup>9</sup> /L) | 255.38±70.51                             | 227.28±57.74                                    | 0.044                       |
| PTA* (%)                 | 101±17                                   | 93±13                                           | 0.021                       |
| ALB (g/U)                | 42.25±4.8                                | 40.53±2.37                                      | 0.036                       |
| Log10(HBV DNA)           | 7.83±0.88                                | 7.48±1.08                                       | 0.102                       |
| APRI                     | 0.86±0.58                                | 1.39±0.95                                       | 0.002                       |

**Note: PTA: Prothrombin time activity; CHE: cholinesterase.**

**Table S2: Univariate analysis of variables associated with significant liver inflammation in 88 adolescent patients with CHB**

| Index                       | Patients with mild liver inflammation (n=31) | Patients with significant liver inflammation (n=57) | Univariate analysis P value |
|-----------------------------|----------------------------------------------|-----------------------------------------------------|-----------------------------|
| Age (years)                 | 7.98 ± 4.42                                  | 9.14 ± 5.28                                         | 0.299                       |
| Sex male                    | 24(77.4%)                                    | 33(57.9%)                                           | 0.067                       |
| female                      | 7(22.6%)                                     | 24(42.1%)                                           |                             |
| ALT(IU/L)                   | 95.61 ± 83.87                                | 186.37 ± 203.50                                     | 0.004                       |
| AST(IU/L)                   | 73.26 ± 37.06                                | 124.51 ± 105.23                                     | 0.001                       |
| AST/ALT                     | 1.01 ± 0.53                                  | 0.87 ± 0.49                                         | 0.217                       |
| TBIL(umol/L)                | 9.50 ± 4.79                                  | 9.63 ± 5.41                                         | 0.908                       |
| CHE(U/L)                    | 8073.74 ± 1262.96                            | 6924.07 ± 1142.87                                   | 0.000                       |
| PLT(×10 <sup>9</sup> /L)    | 263.87 ± 70.17                               | 229.75 ± 60.71                                      | 0.019                       |
| PTA (%)                     | 100 ± 15                                     | 95 ± 15                                             | 0.189                       |
| ALB(g/U)                    | 42.75 ± 5.04                                 | 40.68 ± 2.89                                        | 0.041                       |
| Log <sub>10</sub> (HBV DNA) | 7.87 ± 0.90                                  | 7.55 ± 1.03                                         | 0.145                       |
| APRI                        | 0.75 ± 0.46                                  | 1.32 ± 0.90                                         | 0.000                       |
